# Supplementary material
Source: publisher site journal article supplement (https://www.dovepress.com/article/294650)
Supplement: Supplementary file 1 [file get_supplementary_file.php]

Supplementary file

Table S1: Data extraction format

| **Student ‘s Code** _______ | | |
| --- | --- | --- |
| S. number | Variables | Option |
| 1 | Batch | Year(2015,2016,2017) |
| 2 | Admission Type | Regular/Summer |
| 3 | Sex of students | Male/Female |
| 4 | Pediatrics Academic performance | In number (out of 100%) ______ |
| 5 | Pediatrics Practice Performance | In number (out of 100%) ______ |
